# Supplementary material for: Output current enhancement of hexylthiophene functionalized D–π-extended–A triphenylamine in dye sensitized solar cells
Source: Royal Society of Chemistry journal article supplement (doi:10.1039/c9nj01970g), 2019-01-01
Supplement: c9nj01970g1.pdf [file c9nj01970g1.pdf]

## Supporting Information

### Output Current Enhancement of Hexylthiophene Functionalized D- $\pi$ -Extended-A Triphenylamine in Dye Sensitized Solar Cells

K. L. Vincent Joseph,<sup>a,\*</sup> N. T. Mary Rosana,<sup>b</sup> R. Easwaramoorthi,<sup>c</sup> J. Judith Vijaya,<sup>d</sup> S. Karthikeyan,<sup>e</sup> and Jin Kon Kim,<sup>f</sup>

<sup>a</sup> *New Energy Materials Laboratory, Chennai Institute of Technology, Kundrathur, Chennai – 600 069, Tamil Nadu, India.* \* Corresponding Author, Email: [chemvin@hotmail.com](mailto:chemvin@hotmail.com)

<sup>b</sup> *Department of Chemical Engineering, Sathyabama Institute of Science and Technology, Sholinganallur, Chennai – 600 099 & Department of Chemical Engineering, Rajalakshmi Engineering College (Autonomous), Chennai – 602 105, Tamil Nadu, India.*

<sup>c</sup> *Centre for Solar Energy Materials (CSEM), International Advanced Centre for Powder Metallurgy and Nanomaterials (ARCI), Balapur (PO), Hyderabad-500 005, Telangana, India.*

<sup>d</sup> *Catalysis and Nanomaterials Research Laboratory, Department of Chemistry, Loyola College, Chennai – 600 034, Tamil Nadu, India.*

<sup>e</sup> *PG and Research Department of Chemistry, Khadir Mohideen College, Adirampattinam-614 701, Tamil Nadu, India.*

<sup>f</sup> *National Creative Research Center for Block Copolymer Self-Assembly, Department of Chemical Engineering, Pohang University of Science and Technology, Kyungbuk 790-784, Korea.*

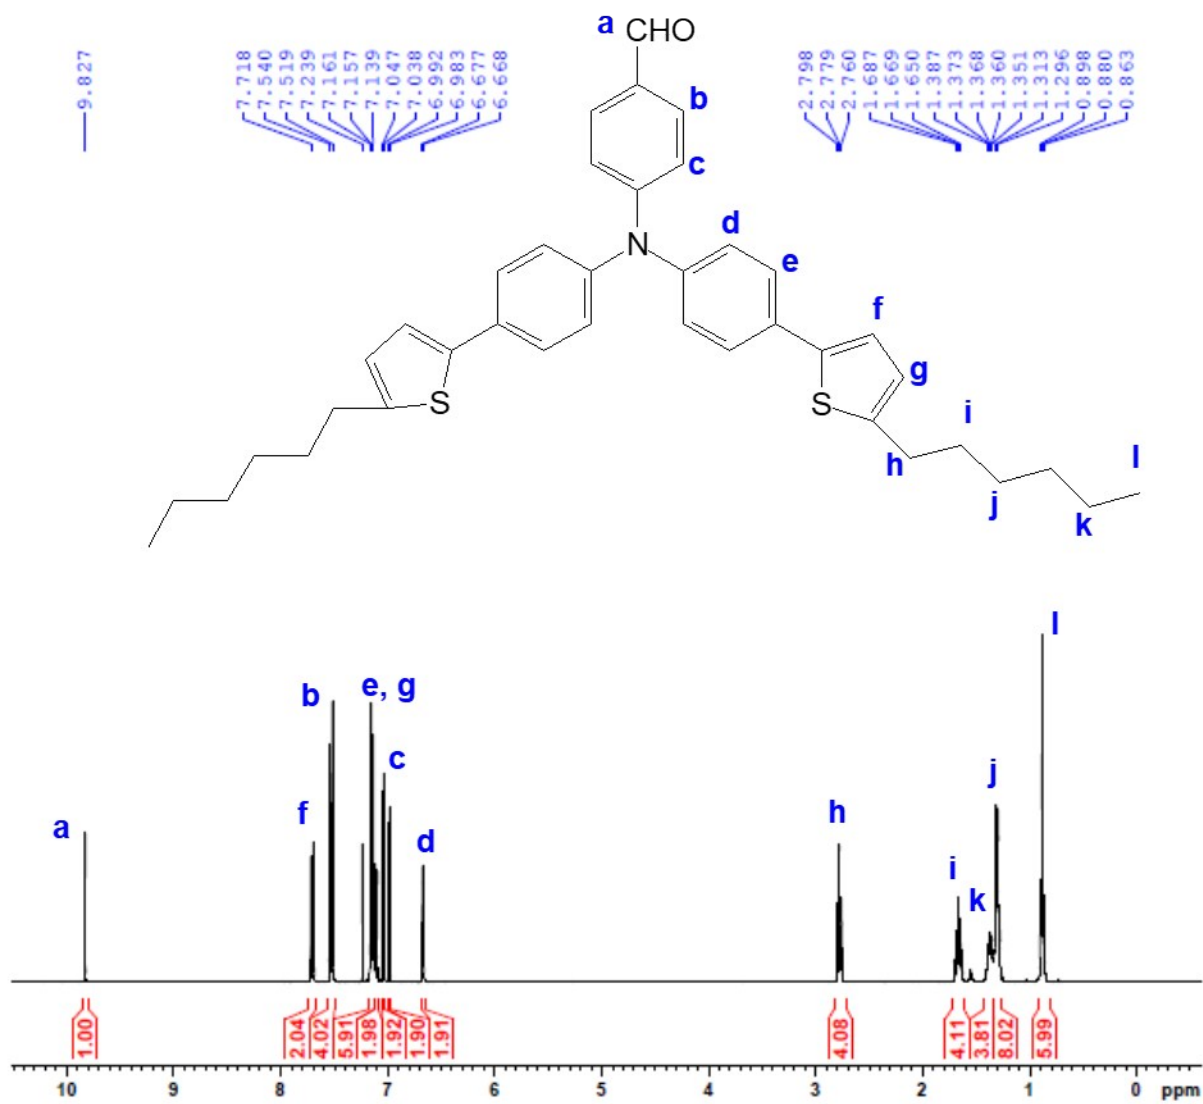

Figure S1. <sup>1</sup>H NMR spectrum of 4-(bis(4-(5-hexylthiophen-2-yl)phenyl)amino)benzaldehyde (2).

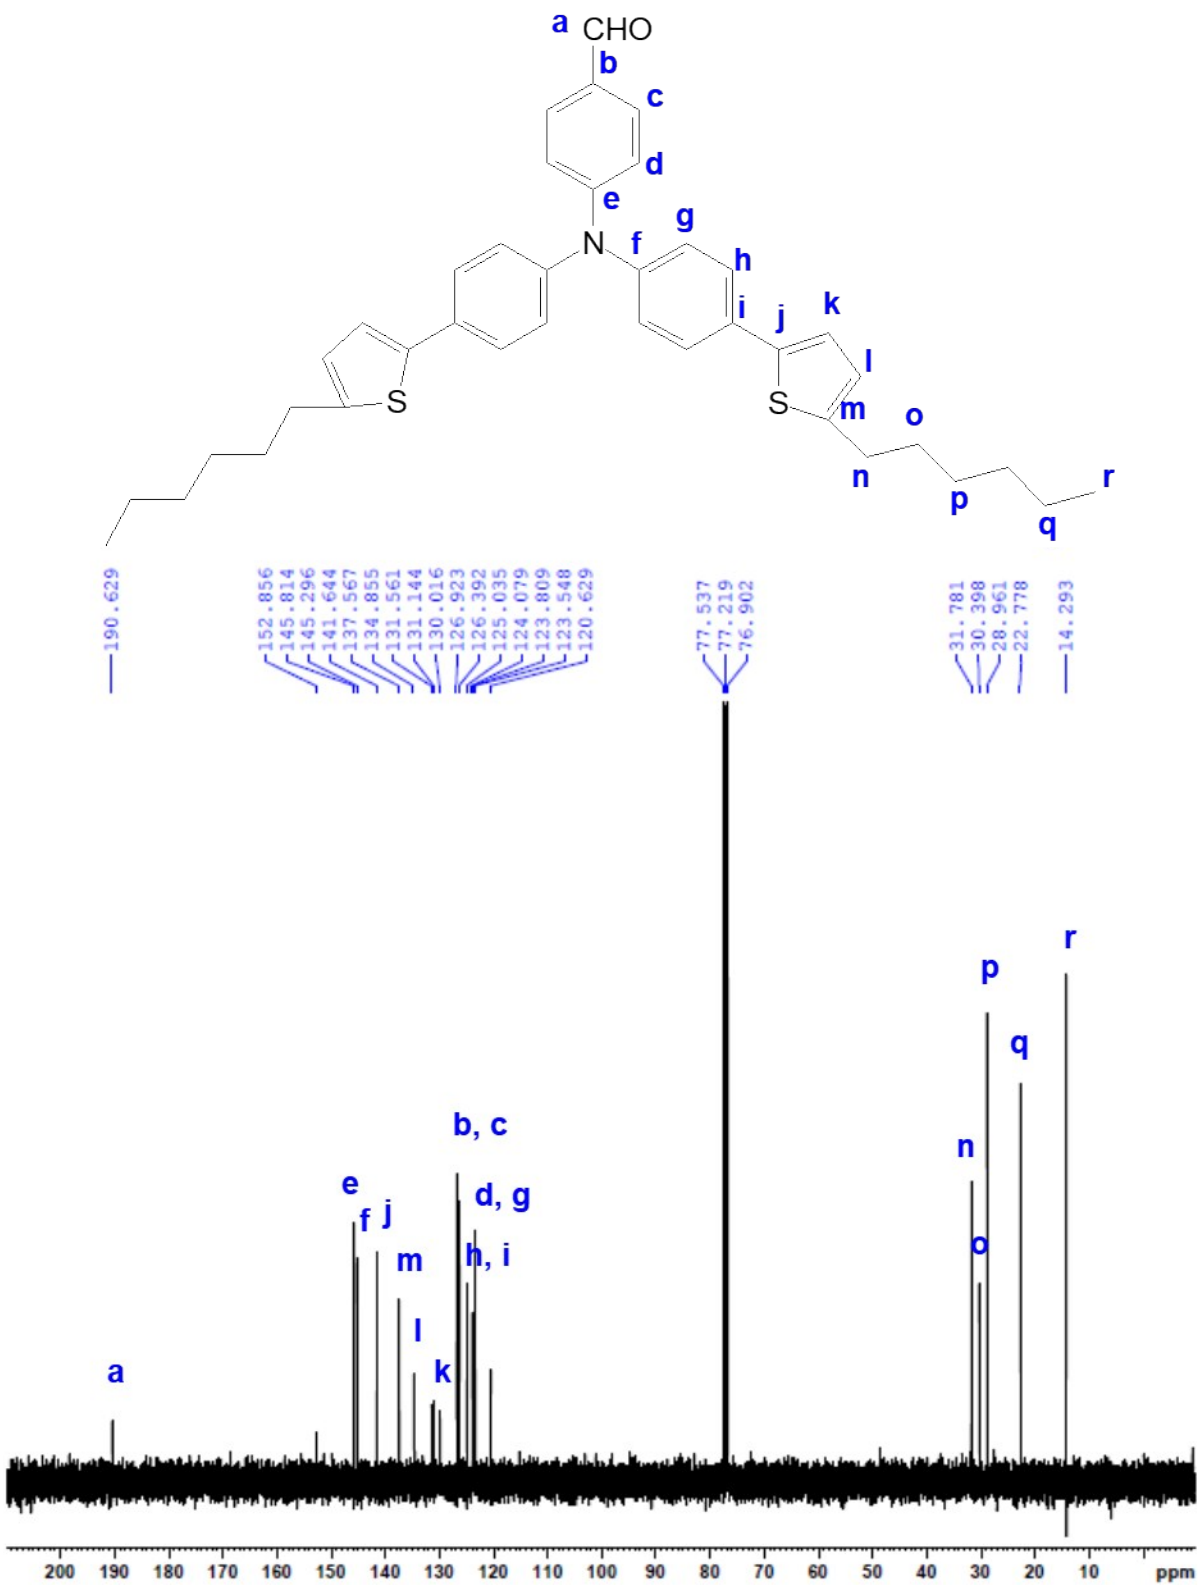

Figure S2. <sup>13</sup>C NMR spectrum of 4-(bis(4-(5-hexylthiophen-2-yl)phenyl)amino)benzaldehyde

(2).

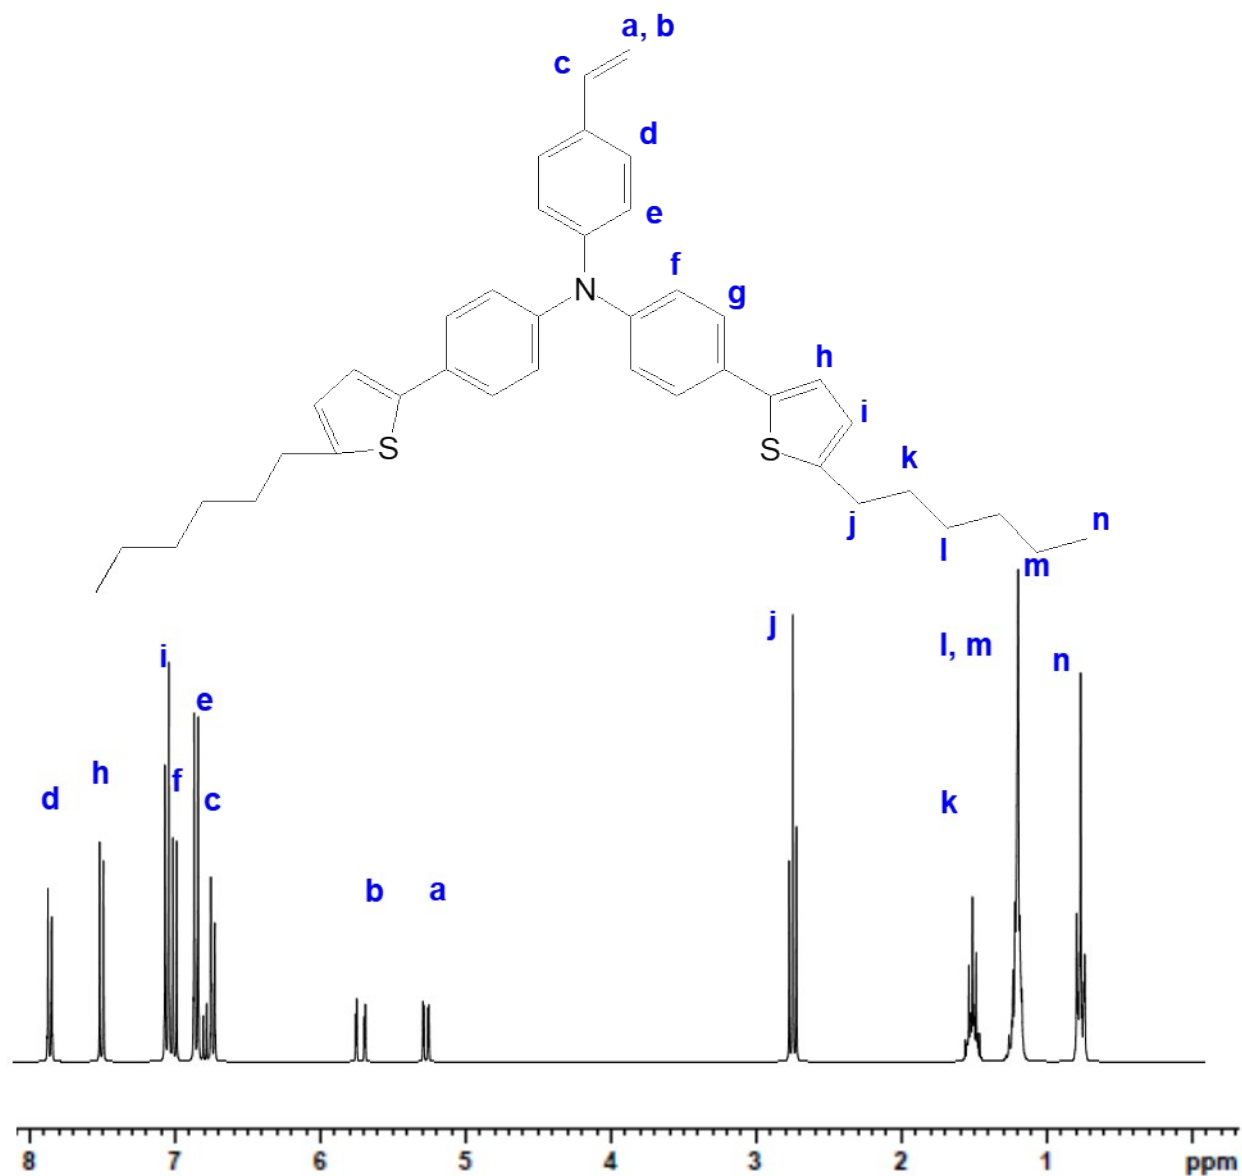

Figure S3. <sup>1</sup>H NMR spectrum of bis-(4-(5-hexylthiophene-2-yl)phenyl)-N-(4-vinylphenyl)benzenamine (**3**).

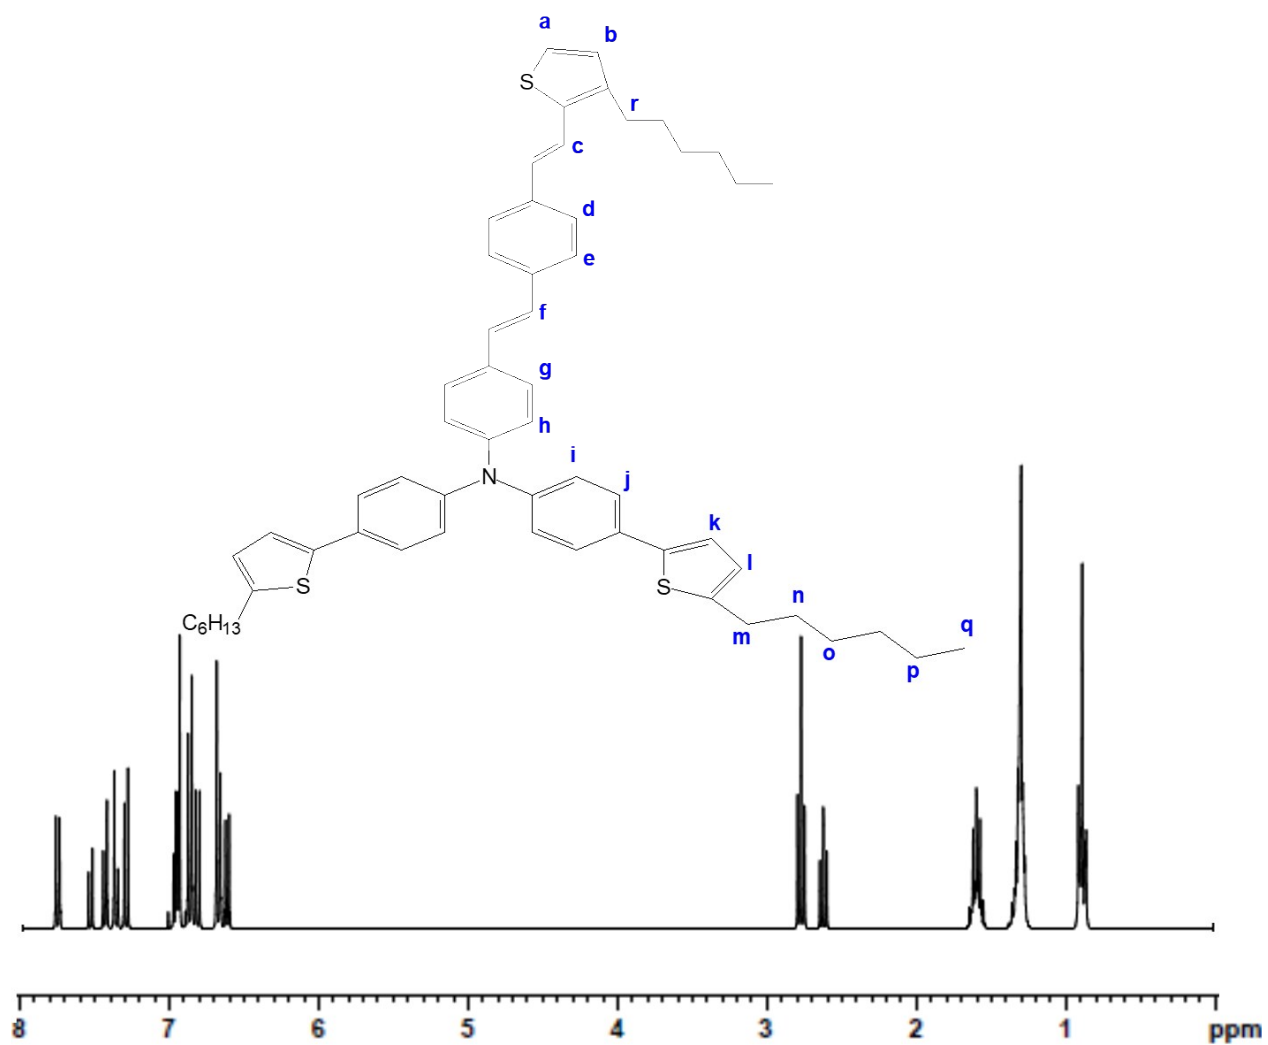

Figure S4. <sup>1</sup>H NMR spectrum of (4-(4(2-(3-hexylthiophene-2-yl)styryl)phenyl)-4-(5-hexylthiophene-2-yl)-4-(5-hexylthiophene-2-yl)phenyl)benzenamine (**4**).

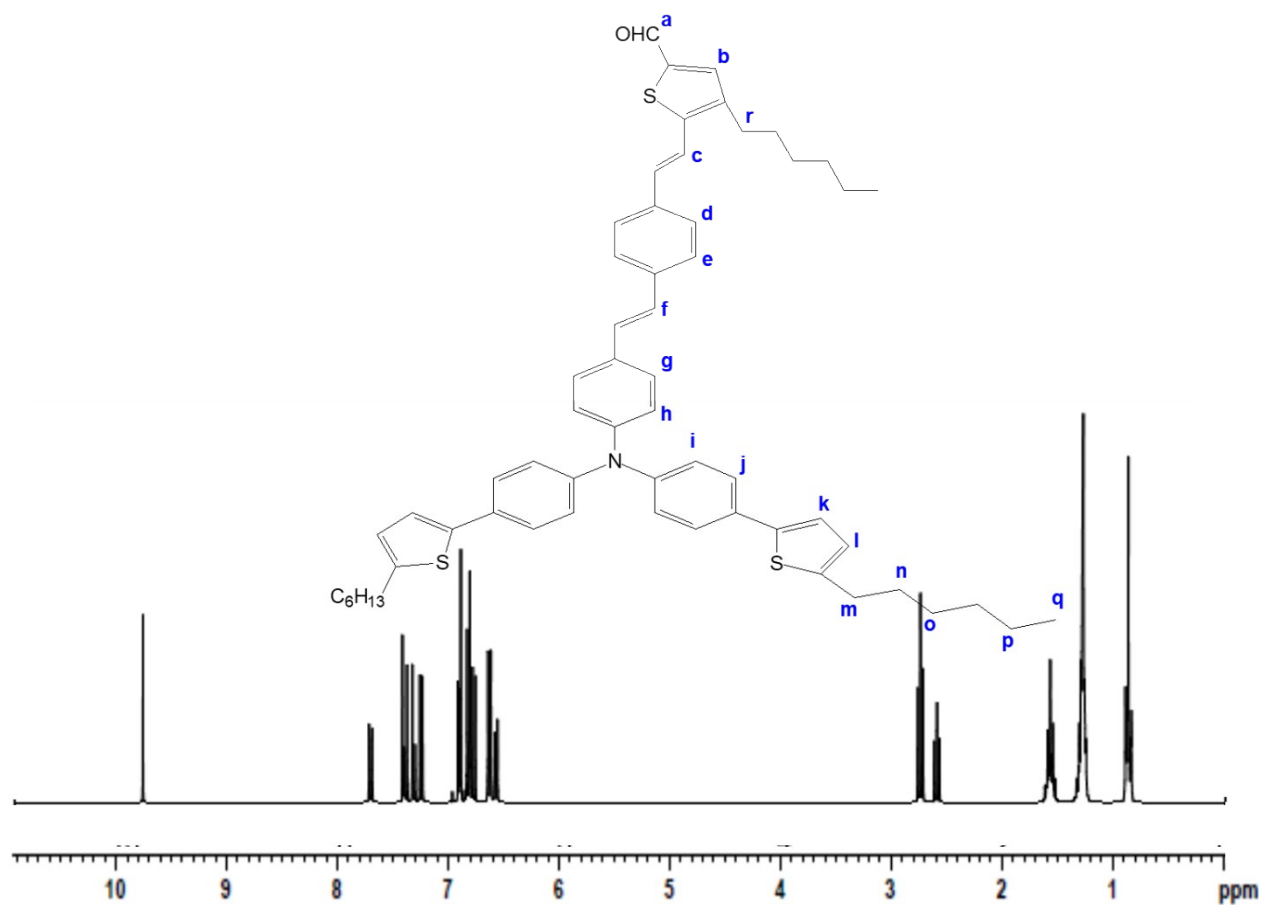

Figure S5. <sup>1</sup>H NMR spectrum of 5-(4-(bis(4-(5-hexylthiophene-2-yl)phenyl)amino)styryl)-4-hexylthiophene-2-carbaldehyde (**5**).

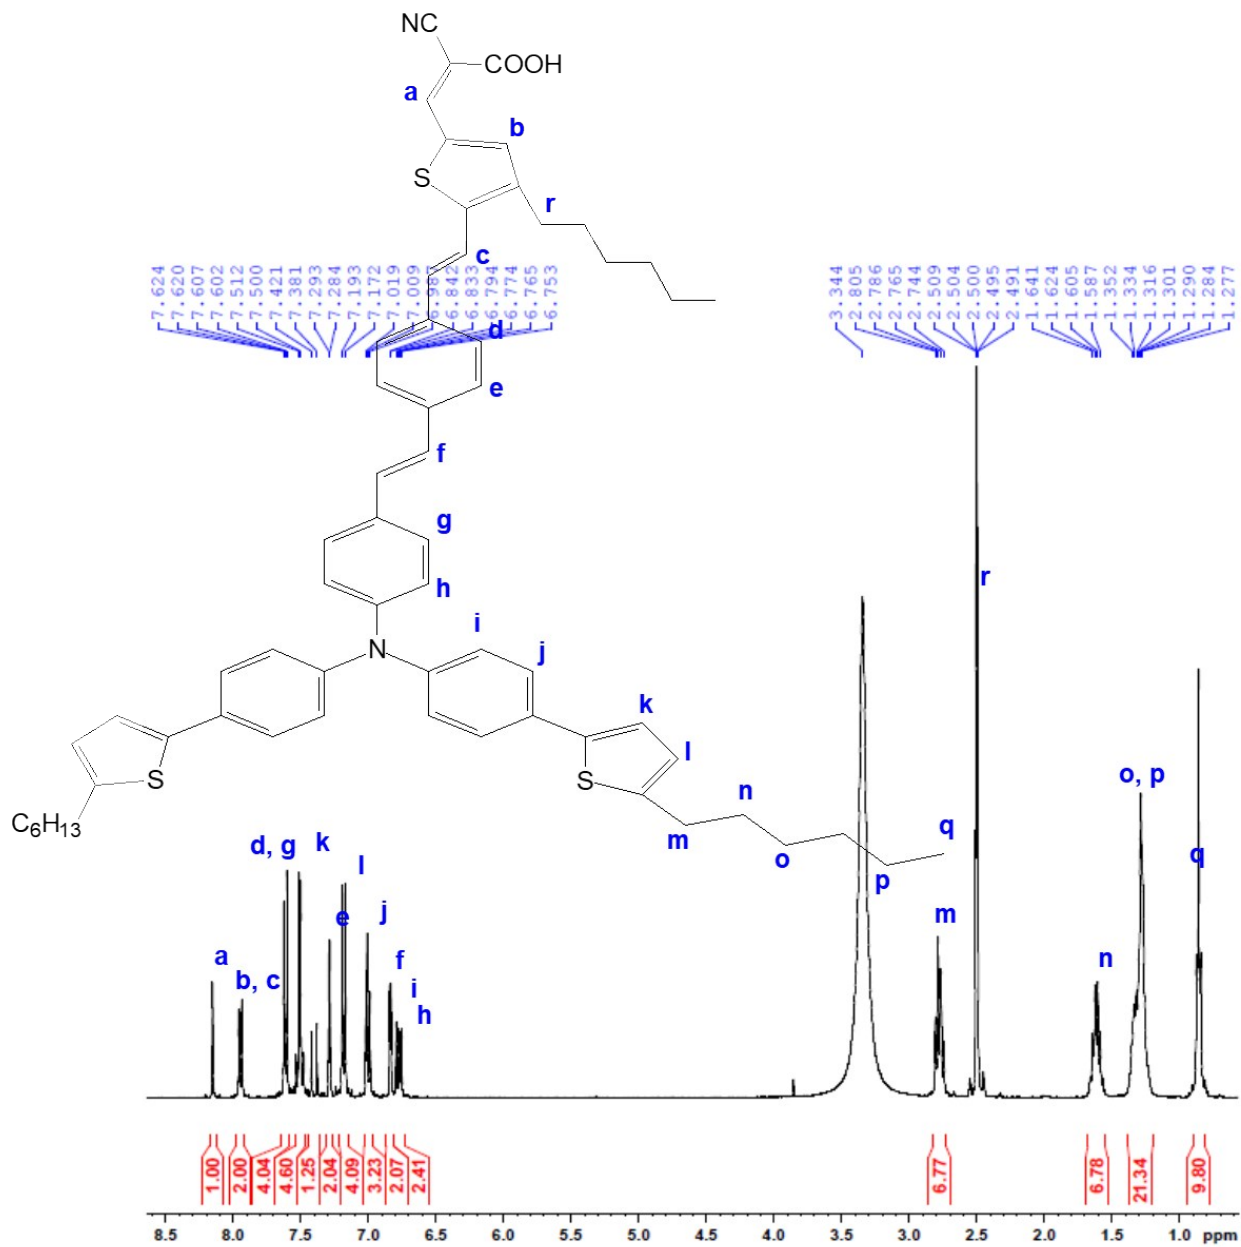

Figure S6. <sup>1</sup>H NMR spectrum of MY-102.

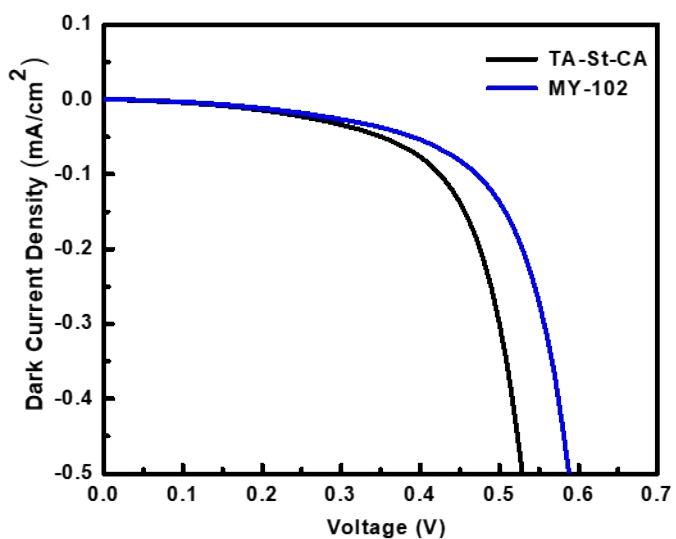

**Fig. S7.**  $J$ - $V$  characteristics of MY-102 under dark conditions.

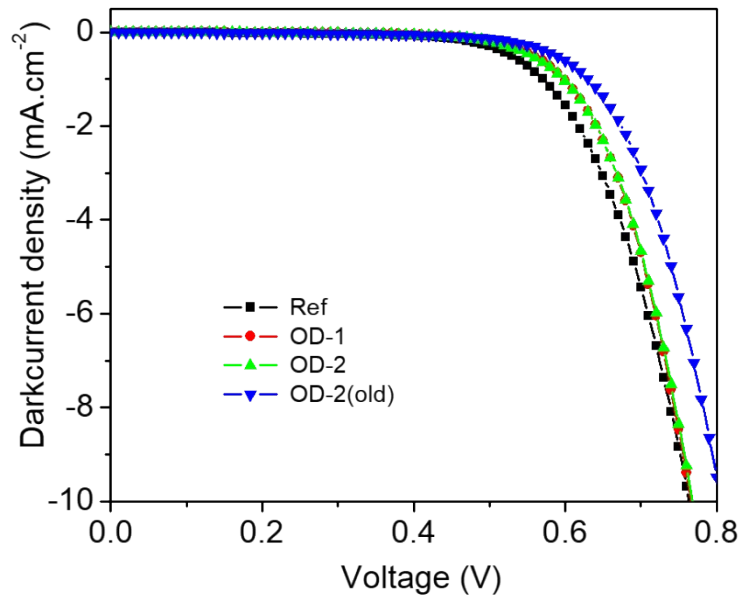

**Fig. S8.**  $J$ - $V$  characteristics of MY-102 in Co(II/III) electrolyte under dark conditions.



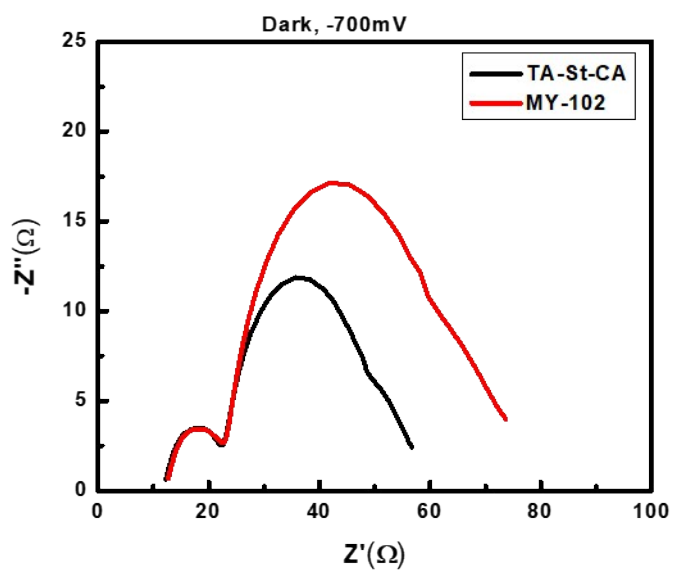

**Fig. S9.** Electrochemical Impedance Spectrum of MY-102 under dark conditions.

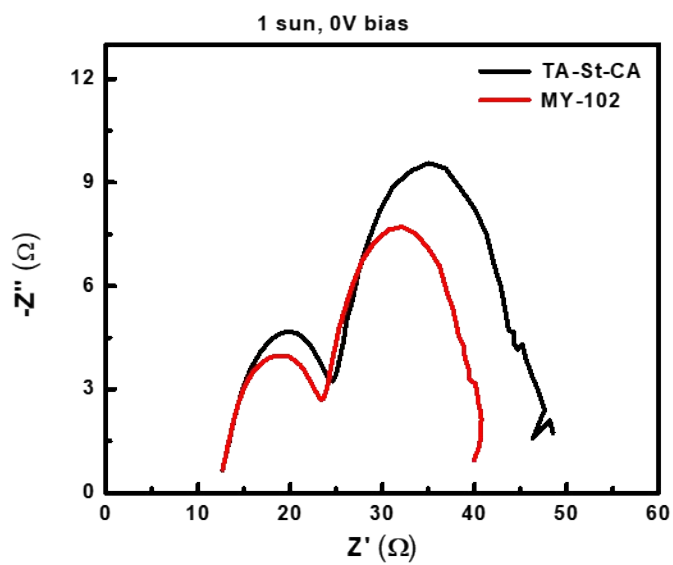

**Fig. S10.** Electrochemical Impedance Spectrum of MY-102 at 1 sun radiation.
